# Supplementary material for: Red-crowned crane (Grus japonensis) prefers postharvest reed beds during winter period in Yancheng National Nature Reserve
Source: PeerJ. 2019 Sep 13;7:e7682. doi: 10.7717/peerj.7682 (PMC6746218; doi:10.7717/peerj.7682)
Supplement: Data S1 [file peerj-07-7682-s001.xlsx]

## Sheet: crane survey
		Crane number in each habitat
No.	Date	smooth cordgrass tidal flats	common seepweed tidal flats	reed ponds	aquaculture fish ponds
1	2018-11-08	0	6	0	0
2	2018-11-10	0	7	0	0
3	2018-11-11	0	6	0	0
4	2018-11-13	1	8	0	0
5	2018-11-14	0	11	0	0
6	2018-11-16	0	10	0	0
7	2018-11-17	0	12	2	0
8	2018-11-18	0	9	0	0
9	2018-11-21	3	7	0	0
10	2018-11-22	0	15	0	0
11	2018-11-23	0	13	0	0
12	2018-11-24	0	12	3	0
13	2018-11-25	0	10	0	0
14	2018-11-26	0	14	0	0
15	2018-11-28	0	15	0	0
16	2018-11-29	0	18	2	0
17	2018-11-30	0	16	0	0
18	2018-12-02	0	12	0	0
19	2018-12-04	0	16	2	0
20	2018-12-05	0	18	0	0
21	2018-12-06	0	16	0	0
22	2018-12-07	4	19	0	0
23	2018-12-10	0	22	0	0
24	2018-12-11	0	20	0	0
25	2018-12-12	0	20	3	0
26	2018-12-13	0	12	0	0
27	2018-12-14	0	16	0	0
28	2018-12-15	0	10	0	0
29	2018-12-16	0	8	0	0
30	2018-12-19	0	5	0	0
31	2018-12-20	1	12	0	0
32	2018-12-22	0	10	0	0
33	2018-12-23	0	8	5	0
34	2018-12-24	0	7	12	0
35	2018-12-30	3	10	10	0
36	2018-12-31	0	8	26	0
37	2019-01-01	0	10	13	0
38	2019-01-02	0	12	9	0
39	2019-01-05	0	18	32	2
40	2019-01-06	0	15	20	0
41	2019-01-08	2	17	15	0
42	2019-01-09	0	8	21	0
43	2019-01-13	3	10	16	3
44	2019-01-14	0	16	19	0
45	2019-01-16	0	8	22	0
46	2019-01-17	0	15	18	1
47	2019-01-19	0	9	27	0
48	2019-01-20	1	12	18	2
49	2019-01-21	0	10	20	3
50	2019-01-23	2	12	12	0
51	2019-01-24	3	9	15	0
52	2019-01-25	0	16	21	0
53	2019-01-27	1	14	11	0
54	2019-01-28	0	13	16	2
55	2019-01-29	0	15	18	0
56	2019-01-30	0	11	15	0
57	2019-02-02	0	10	27	0
58	2019-02-03	0	16	22	0
59	2019-02-04	0	18	19	0
60	2019-02-09	0	9	25	0
61	2019-02-10	0	15	20	0
62	2019-02-15	2	12	18	0
63	2019-02-17	0	11	23	0
64	2019-02-20	0	10	27	0
65	2019-02-21	0	8	21	0
66	2019-02-25	0	12	18	0
67	2019-02-26	0	7	23	0
68	2019-03-03	0	0	30	0
69	2019-03-04	0	5	9	0
70	2019-03-05	0	0	15	0
71	2019-03-06	0	0	6	0

## Sheet: food resoure collection
	Phase	Preharvest period																														Postharvest period
	Habitat	Common seepweed tidal flats															Reed beds															Common seepweed tidal flats															Reed beds
	Plot (P)	P 1					P 2					P 3					P 1					P 2					P 3					P 1					P 2					P 3					P 1
	Quadrat (Q)	Q1	Q2	Q3	Q4	Q5	Q1	Q2	Q3	Q4	Q5	Q1	Q2	Q3	Q4	Q5	Q1	Q2	Q3	Q4	Q5	Q1	Q2	Q3	Q4	Q5	Q1	Q2	Q3	Q4	Q5	Q1	Q2	Q3	Q4	Q5	Q1	Q2	Q3	Q4	Q5	Q1	Q2	Q3	Q4	Q5	Q1	Q2	Q3
Annelid	Tylorrhynchus heterochaetus				*	*	*	*		*		*			*	*																*		*	*				*	*
Mollusca	Glauconome chinensis	*				*								*																					*		*		*		*	*			*	*
	Cyclina sinensis								*	*			*			*																	*		*	*					*		*	*
	Oncomelania hupensis	*																																				*
Arthropoda	Chiromantes dehaani	*	*	*			*		*								*		*	*	*	*		*		*	*				*	*				*		*						*	*
	Helice tridens tientsinensis		*			*	*				*	*		*			*	*			*						*	*			*			*			*		*		*	*				*
	Macrophthalmus japonicus	*			*				*	*		*	*	*	*	*			*				*		*				*	*			*	*		*		*		*		*
Chordata	Periophthalmus modestus	*		*	*	*		*			*						*				*	*			*				*		*	*									*					*	*
	Pelteobagrus fulvidraco																																															*
	Ilisha elongate																																																*
	Erythroculter ilishaeformis																																														*	*
	Carassius auratus																																														*
	Mylopharyngodon piceus
	Ophiocephalus argus
food biomass（g）		74.89	52.73	51.44	40.7	58.24	72.73	71.74	57.66	44.86	42.51	88.69	60.09	53.25	60.05	49.42	85.96	44.45	43.16	49.05	77.38	72.15	77.42	49.64	36.41	23.38	78.49	46.65	49.01	53.48	63.87	53.94	38.02	34.8	31.76	36.48	47.22	59.04	24.03	29.59	46.62	42.23	76.09	42.89	47.44	39.35	51.22	60.38	63.97
	* represent the existence of the species in the habitat
[truncated: 12 more columns]
